# Supplementary material for: Assembly of thermostable fused compounds with oxidizers for laser-ignited energetic materials
Source: Royal Society of Chemistry journal article supplement (doi:10.1039/d4ce00006d), 2024-01-01
Supplement: d4ce00006d1.pdf [file d4ce00006d1.pdf]

## Supporting Information

### Assembly of thermostable fused compound with oxidizer for laser-ignited energetic materials

Hongyu Lv<sup>a</sup>, Siwei Song<sup>\*a</sup>, Dangyue Yin<sup>a</sup>, Xiue Jiang<sup>a</sup>, Yang Li<sup>a</sup>, Zhiwei Li<sup>a</sup>, Wen Ao<sup>a</sup>, Yi Wang<sup>a</sup>,  
Qinghua Zhang<sup>\*a</sup>

<sup>a</sup>School of Astronautics, Northwestern Polytechnical University, Xi'an, 710072, China.

\*Corresponding to Siwei Song (ssw\_sv@nwpu.edu.cn) and Qinghua Zhang  
(qinghuazhang@nwpu.edu.cn).

**Table S1. Crystal data and structure refinement for compound 1.** Single crystal X-ray diffraction data was collected on an Oxford Xcalibur diffractometer with Mo-K $\alpha$  monochromated radiation ( $\lambda=0.71073$  Å). The crystal structures were solved by direct methods. The structures were refined on F<sup>2</sup> by full-matrix least-squares methods using the SHELXTL script package. All non-hydrogen atoms were refined anisotropically.

|                                           |                                                                     |
|-------------------------------------------|---------------------------------------------------------------------|
| CCDC number                               | 2322400                                                             |
| Empirical formula                         | C <sub>5</sub> H <sub>5</sub> N <sub>9</sub> O <sub>7</sub>         |
| Formula weight                            | 303.18                                                              |
| Temperature [K]                           | 298.15                                                              |
| Crystal system                            | orthorhombic                                                        |
| Space group (number)                      | <i>Pbca</i> (61)                                                    |
| <i>a</i> [Å]                              | 9.7501(6)                                                           |
| <i>b</i> [Å]                              | 8.8976(5)                                                           |
| <i>c</i> [Å]                              | 24.5696(16)                                                         |
| $\alpha$ [°]                              | 90                                                                  |
| $\beta$ [°]                               | 90                                                                  |
| $\gamma$ [°]                              | 90                                                                  |
| Volume [Å <sup>3</sup> ]                  | 2131.5(2)                                                           |
| <i>Z</i>                                  | 8                                                                   |
| $\rho_{\text{calc}}$ [gcm <sup>-3</sup> ] | 1.890                                                               |
| $\mu$ [mm <sup>-1</sup> ]                 | 0.174                                                               |
| <i>F</i> (000)                            | 1232                                                                |
| 2 $\theta$ range [°]                      | 5.33 to 61.50 (0.69 Å)                                              |
| Index ranges                              | $-13 \leq h \leq 12$<br>$-12 \leq k \leq 9$<br>$-29 \leq l \leq 34$ |
| Reflections collected                     | 13334                                                               |
| Independent reflections                   | 2806                                                                |
|                                           | $R_{\text{int}} = 0.0526$<br>$R_{\text{sigma}} = 0.0484$            |
| Data / Restraints / Parameters            | 2806/0/194                                                          |
| Goodness-of-fit on <i>F</i> <sup>2</sup>  | 1.046                                                               |
| Final <i>R</i> indexes                    | $R_1 = 0.0429$                                                      |
| [ $I \geq 2\sigma(I)$ ]                   | $wR_2 = 0.0991$                                                     |
| Final <i>R</i> indexes                    | $R_1 = 0.0703$                                                      |
| [all data]                                | $wR_2 = 0.1107$                                                     |
| Largest peak/hole [eÅ <sup>-3</sup> ]     | 0.25/−0.37                                                          |

**Table S2. Bond lengths and angles for compound 1**

| Atom–Atom | Length [Å] | Atom–Atom–Atom | Angle [°]  |
|-----------|------------|----------------|------------|
| O5–N9     | 1.2553(18) | C4–N4–C3       | 118.20(14) |
| O6–N9     | 1.2491(17) | C4–N4–H4       | 120.6(14)  |
| O7–N9     | 1.2559(18) | C3–N4–H4       | 121.2(14)  |
| O3–N6     | 1.2212(19) | N1–N2–C2       | 125.14(13) |
| O4–N6     | 1.2170(19) | C4–N2–N1       | 113.71(13) |
| N4–C4     | 1.350(2)   | C4–N2–C2       | 121.02(14) |
| N4–C3     | 1.376(2)   | C2–N3–C3       | 120.01(14) |
| N4–H4     | 0.86(2)    | O5–N9–O7       | 120.50(13) |
| N2–N1     | 1.378(2)   | O6–N9–O5       | 120.05(14) |
| N2–C2     | 1.392(2)   | O6–N9–O7       | 119.43(14) |
| N2–C4     | 1.359(2)   | C1–N1–N2       | 102.15(13) |
| N3–C2     | 1.318(2)   | H8A–N8–H8B     | 120        |
| N3–C3     | 1.342(2)   | C3–N8–H8A      | 120        |
| N1–C1     | 1.309(2)   | C3–N8–H8B      | 120        |
| N8–H8A    | 0.86       | O3–N6–C1       | 116.53(14) |
| N8–H8B    | 0.86       | O4–N6–O3       | 125.90(15) |
| N8–C3     | 1.305(2)   | O4–N6–C1       | 117.56(14) |
| N6–C1     | 1.462(2)   | H7A–N7–H7B     | 120        |
| N7–H7A    | 0.86       | C2–N7–H7A      | 120        |
| N7–H7B    | 0.86       | C2–N7–H7B      | 120        |
| N7–C2     | 1.303(2)   | N3–C2–N2       | 118.90(14) |
| C4–C5     | 1.380(2)   | N7–C2–N2       | 118.79(15) |
| C5–C1     | 1.404(2)   | N7–C2–N3       | 122.30(15) |
| C5–N5     | 1.413(2)   | N4–C4–N2       | 119.19(14) |
| N5–O1     | 1.2311(19) | N4–C4–C5       | 135.40(15) |
| N5–O2     | 1.2307(18) | N2–C4–C5       | 105.40(14) |
|           |            | N3–C3–N4       | 122.24(15) |
|           |            | N8–C3–N4       | 118.39(15) |
|           |            | N8–C3–N3       | 119.36(15) |
|           |            | C4–C5–C1       | 104.43(14) |
|           |            | C4–C5–N5       | 127.96(15) |
|           |            | C1–C5–N5       | 127.28(15) |
|           |            | N1–C1–N6       | 120.77(14) |
|           |            | N1–C1–C5       | 114.31(15) |
|           |            | C5–C1–N6       | 124.88(14) |
|           |            | O1–N5–C5       | 117.28(14) |
|           |            | O2–N5–C5       | 117.48(14) |
|           |            | O2–N5–O1       | 125.19(14) |

**Table S3. The specific parameters of hydrogen bonds of 1**

| Donor  | Acceptor | D-H (Å) | H...A (Å) | D...A (Å) | D-H...A (°) |
|--------|----------|---------|-----------|-----------|-------------|
| N7-H7A | O6       | 0.86    | 2.127     | 2.951     | 160.5       |
| N7-H7A | O7       | 0.86    | 2.604     | 3.35      | 145.8       |
| N8-H8B | O5       | 0.86    | 2.062     | 2.92      | 175.6       |
| N4-H4  | O7       | 0.86    | 1.91      | 2.767     | 174.2       |
| N8-H8A | O5       | 0.86    | 2.107     | 2.964     | 174.3       |
| N8-H8A | O6       | 0.86    | 2.428     | 3.032     | 127.8       |

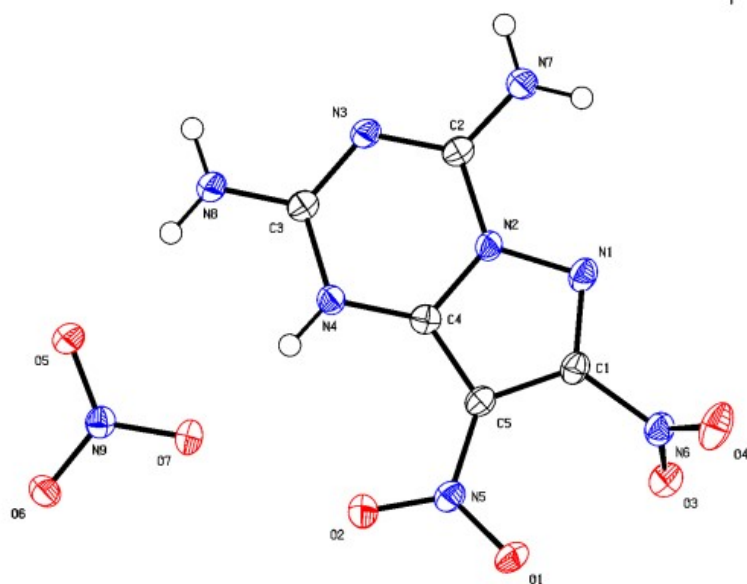

**Table S4. Crystal data and structure refinement for compound 2.** Single crystal X-ray diffraction data was collected on an Oxford Xcalibur diffractometer with Mo-K $\alpha$  monochromated radiation ( $\lambda=0.71073$  Å). The crystal structures were solved by direct methods. The structures were refined on F<sup>2</sup> by full-matrix least-squares methods using the SHELXTL script package. All non-hydrogen atoms were refined anisotropically.

|                                           |                                                                    |
|-------------------------------------------|--------------------------------------------------------------------|
| CCDC number                               | 2322401                                                            |
| Empirical formula                         | C <sub>5</sub> H <sub>5</sub> ClN <sub>8</sub> O <sub>8</sub>      |
| Formula weight                            | 340.62                                                             |
| Temperature [K]                           | 181.0                                                              |
| Crystal system                            | monoclinic                                                         |
| Space group (number)                      | <i>P</i> 2 <sub>1</sub> / <i>c</i> (14)                            |
| <i>a</i> [Å]                              | 7.2532(4)                                                          |
| <i>b</i> [Å]                              | 12.1486(8)                                                         |
| <i>c</i> [Å]                              | 13.3337(8)                                                         |
| $\alpha$ [°]                              | 90                                                                 |
| $\beta$ [°]                               | 104.280(2)                                                         |
| $\gamma$ [°]                              | 90                                                                 |
| Volume [Å <sup>3</sup> ]                  | 1138.61(12)                                                        |
| <i>Z</i>                                  | 4                                                                  |
| $\rho_{\text{calc}}$ [gcm <sup>-3</sup> ] | 1.987                                                              |
| $\mu$ [mm <sup>-1</sup> ]                 | 0.406                                                              |
| <i>F</i> (000)                            | 688                                                                |
| 2 $\theta$ range [°]                      | 4.60 to 55.06 (0.77 Å)                                             |
| Index ranges                              | $-9 \leq h \leq 8$<br>$-12 \leq k \leq 15$<br>$-17 \leq l \leq 17$ |
| Reflections collected                     | 10654                                                              |
| Independent reflections                   | 2577<br>$R_{\text{int}} = 0.0490$<br>$R_{\text{sigma}} = 0.0433$   |
| Data / Restraints / Parameters            | 2577/0/199                                                         |
| Goodness-of-fit on <i>F</i> <sup>2</sup>  | 1.040                                                              |
| Final <i>R</i> indexes                    | $R_1 = 0.0365$                                                     |
| [ $I \geq 2\sigma(I)$ ]                   | $wR_2 = 0.0887$                                                    |
| Final <i>R</i> indexes                    | $R_1 = 0.0476$                                                     |
| [all data]                                | $wR_2 = 0.0982$                                                    |
| Largest peak/hole [eÅ <sup>-3</sup> ]     | 0.31/−0.46                                                         |

**Table S5. Bond lengths and angles for compound 2**

| Atom–Atom | Length [Å] | Atom–Atom–Atom | Angle [°]  |
|-----------|------------|----------------|------------|
| C11–O3    | 1.4470(14) | O12–C11–O3     | 110.09(9)  |
| C11–O12   | 1.4243(15) | O12–C11–O17    | 108.76(10) |
| C11–O17   | 1.4394(15) | O12–C11–O18    | 111.08(10) |
| C11–O18   | 1.4358(14) | O17–C11–O3     | 108.84(9)  |
| O1–N8     | 1.226(2)   | O18–C11–O3     | 109.23(9)  |
| N2–C13    | 1.345(2)   | O18–C11–O17    | 108.79(10) |
| N2–C20    | 1.371(2)   | C13–N2–C20     | 118.45(16) |
| N4–C15    | 1.308(2)   | C21–N5–N7      | 102.37(15) |
| N5–N7     | 1.375(2)   | N5–N7–C15      | 124.89(15) |
| N5–C21    | 1.307(2)   | C13–N7–N5      | 113.64(14) |
| N6–C20    | 1.312(2)   | C13–N7–C15     | 121.23(15) |
| N7–C13    | 1.355(2)   | O1–N8–O11      | 124.72(16) |
| N7–C15    | 1.388(2)   | O1–N8–C19      | 118.82(15) |
| N8–O11    | 1.235(2)   | O11–N8–C19     | 116.46(15) |
| N8–C19    | 1.415(2)   | C15–N9–C20     | 119.57(16) |
| N9–C15    | 1.317(2)   | N2–C13–N7      | 118.64(15) |
| N9–C20    | 1.334(2)   | N2–C13–C19     | 135.57(17) |
| O10–N16   | 1.222(2)   | N7–C13–C19     | 105.78(15) |
| C13–C19   | 1.381(2)   | N4–C15–N7      | 117.35(16) |
| O14–N16   | 1.213(2)   | N4–C15–N9      | 123.68(17) |
| N16–C21   | 1.457(2)   | N9–C15–N7      | 118.96(17) |
| C19–C21   | 1.410(3)   | O10–N16–C21    | 116.43(16) |
|           |            | O14–N16–O10    | 125.81(16) |
|           |            | O14–N16–C21    | 117.69(16) |
|           |            | C13–C19–N8     | 124.77(16) |
|           |            | C13–C19–C21    | 103.94(15) |
|           |            | C21–C19–N8     | 131.28(16) |
|           |            | N6–C20–N2      | 118.17(17) |
|           |            | N6–C20–N9      | 119.42(16) |
|           |            | N9–C20–N2      | 122.41(16) |
|           |            | N5–C21–N16     | 116.42(16) |
|           |            | N5–C21–C19     | 114.25(15) |
|           |            | C19–C21–N16    | 129.20(16) |

**Table S6.** The specific parameters of hydrogen bonds of compound **2**



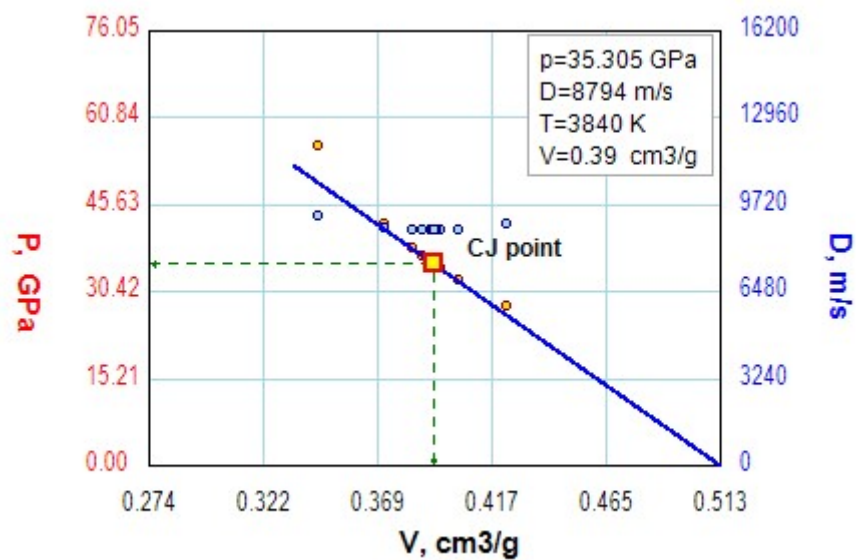

Fig.S1 The detonation performances figure of compound 1.

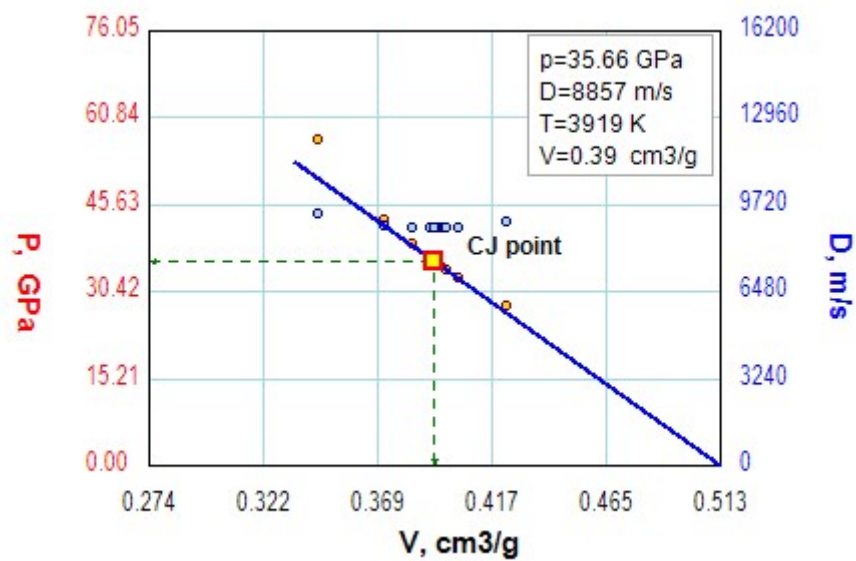

Fig.S2 The detonation performances figure of compound 2.

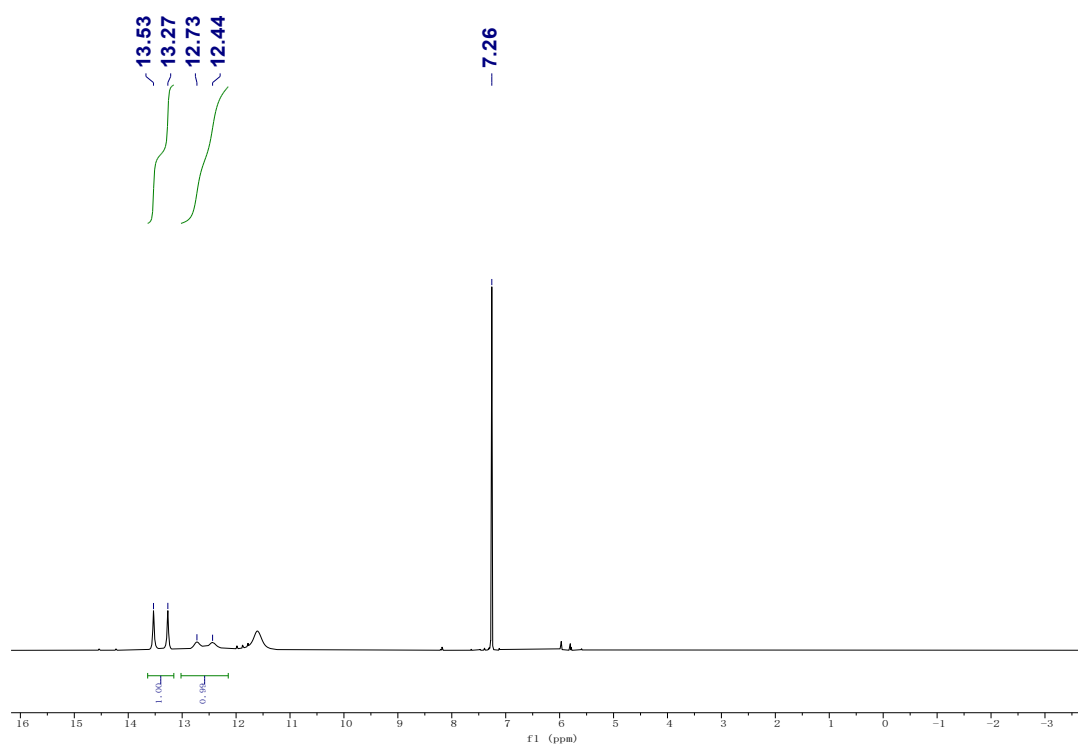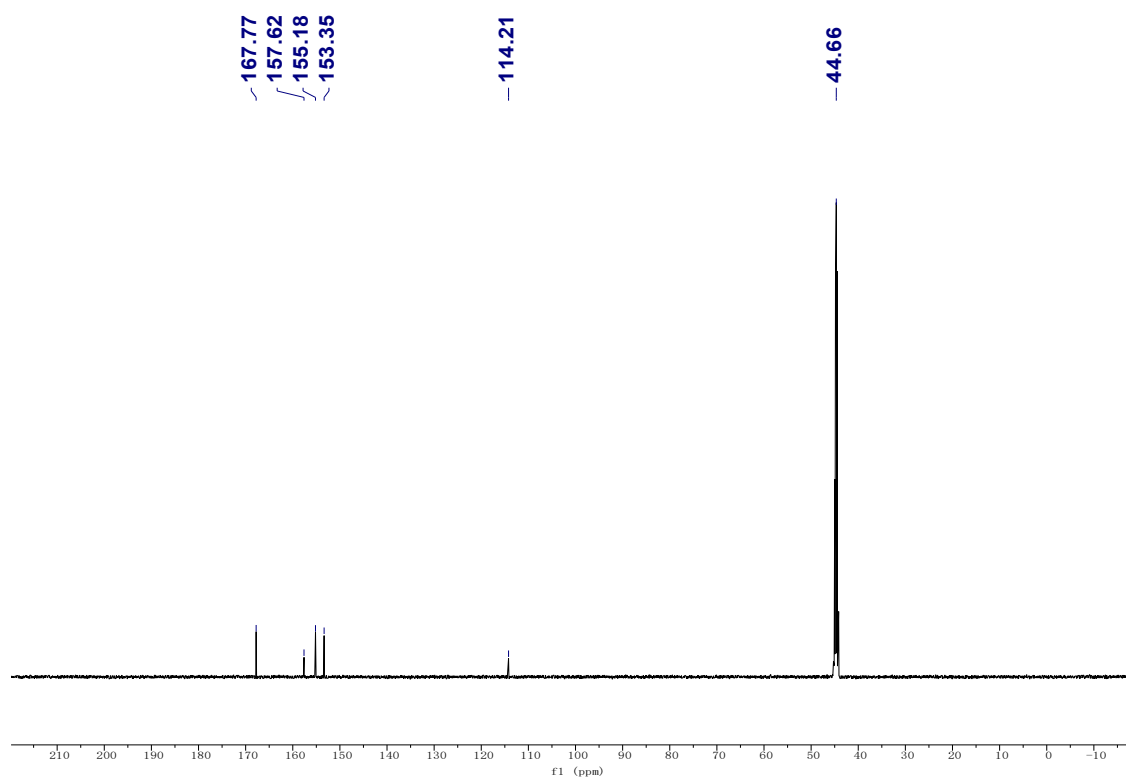

**Fig.S3** <sup>1</sup>H NMR and <sup>13</sup>C NMR spectra for compound 1

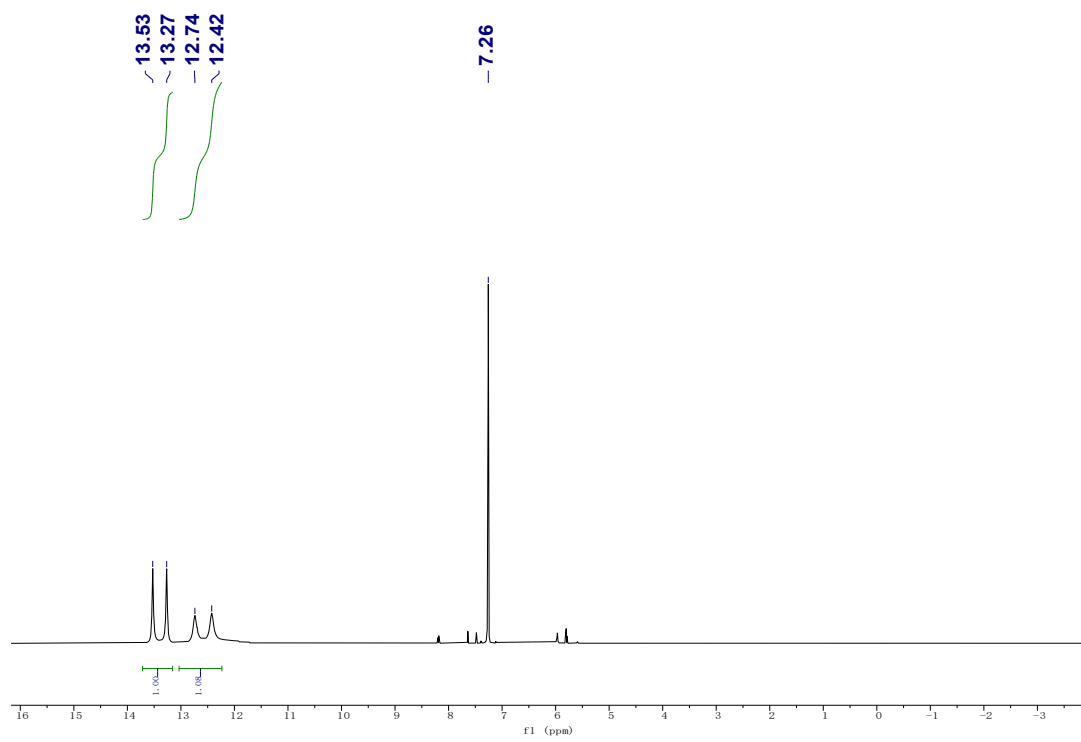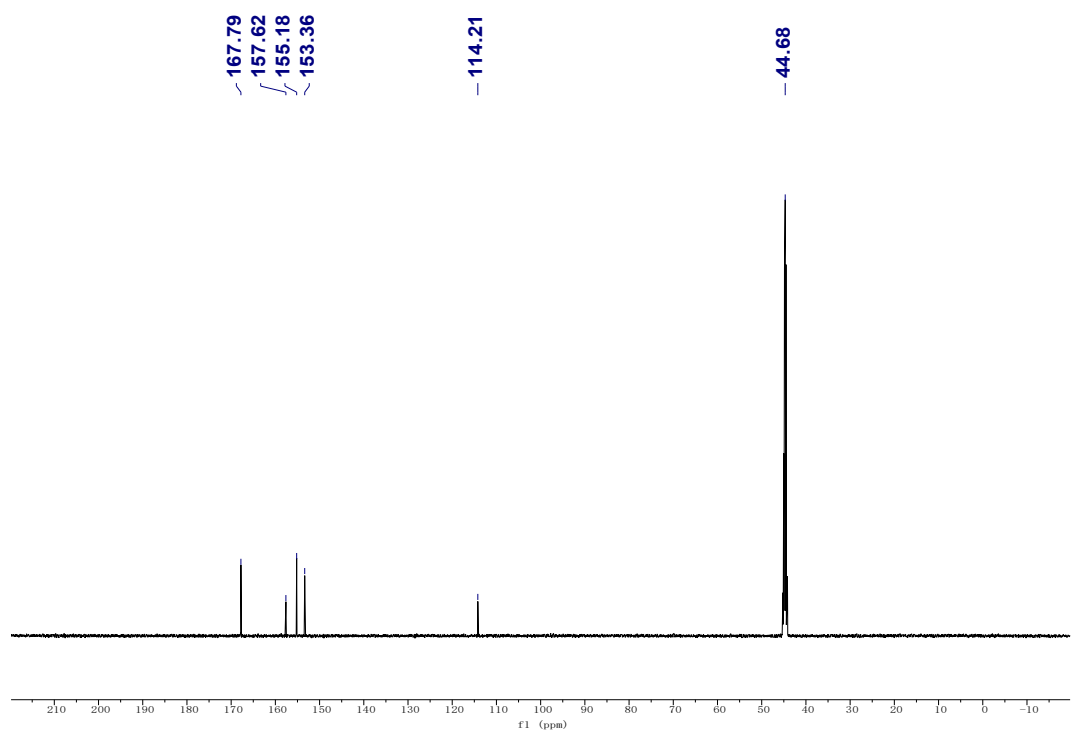

**Fig.S4** <sup>1</sup>H NMR and <sup>13</sup>C NMR spectra for compound 2

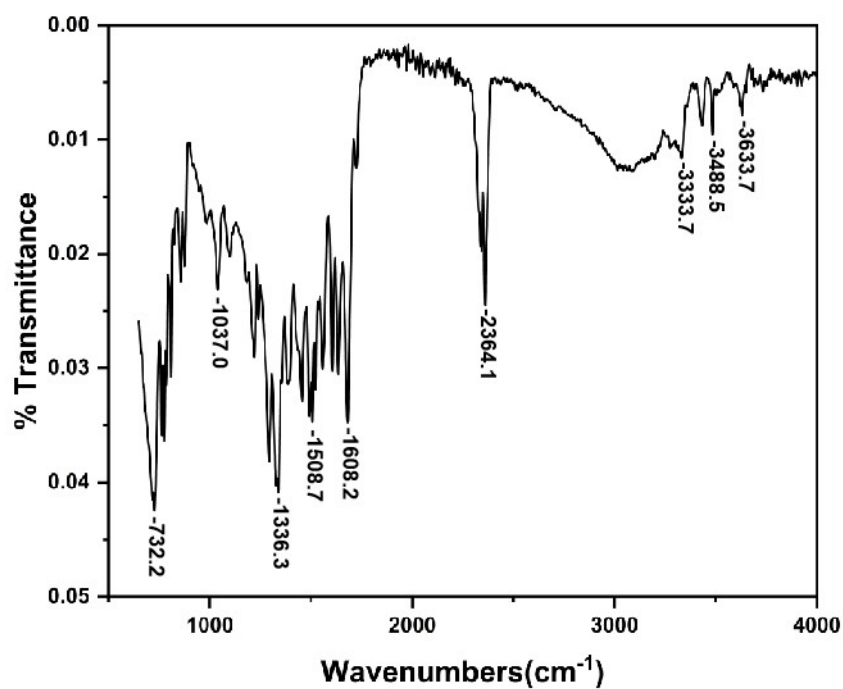

Fig.S5 IR spectra for compound 1

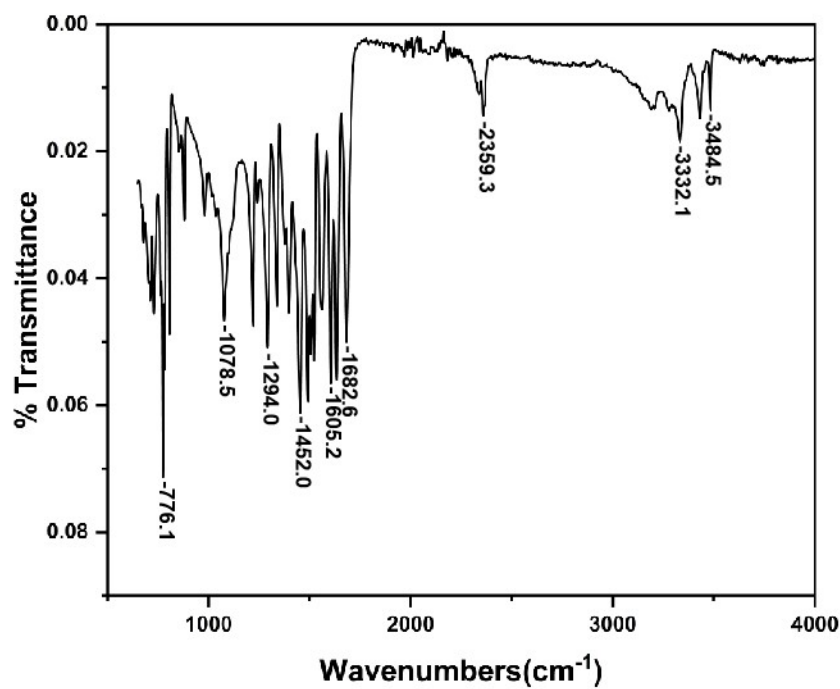

Fig.S6 IR spectra for compound 2

### **Preparation of 4-nitro-1H-pyrazole-3,5-diamine hydrochloride**

4-nitro-1H-pyrazole-3,5-diamine was prepared according to a previously reported route [24]. Concentrated hydrochloric acid (3 mL) was added to the suspension of 4-nitro-1H-pyrazole-3,5-diamine (3 mmol, 0.429g) in MeOH (5 mL). After stirring for 10 minutes, light yellow solid was filtered and washed using EtOAc to afford 4-nitro-1H-pyrazole-3,5-diamine hydrochloride (yield of 80%).

### **Preparation of 8-nitropyrazolo[1,5-a][1,3,5]triazine-2,4,7-triamine**

This intermediate was prepared according to a previously reported route with slight changes [25]. First, 4-nitro-1H-pyrazole-3,5-diamine hydrochloride (3 mmol, 0.54g) was suspended in EtOH (11 mL). Then, dicyandiamide (4mmol, 0.33g) was added in the suspension. The mixture was refluxed at 80 °C for 6 hours. During the refluxing, orange solid gradually appeared in the solution. The orange solid was filtered and recrystallized using water at 80 °C to give a yellow solid (8-nitropyrazolo[1,5-a][1,3,5]triazine-2,4,7-triamine; yield of 60%).

### **Preparation of 7,8-dinitropyrazolo[1,5-a][1,3,5]triazine-2,4-diamine (ICM-104)**

In the ice-water bath, 8-nitropyrazolo[1,5-a][1,3,5] triazine-2,4,7-triamine (3 mmol, 0.63g) was added to concentrated sulfuric acid (6 mL) in portion. Then, 30% hydrogen peroxide (2.5 mL) was added dropwise to the solution. After stirring under room temperature for 3 hours, the reaction was quenched using crashed ice and the solution was extracted using EtOAc. Then, EtOAc was removed using rotary evaporation. Light yellow solid was collected as the target compound (7,8-dinitropyrazolo[1,5-a][1,3,5]triazine-2,4-diamine (ICM-104, yield of 42%). <sup>1</sup>H NMR (DMSO-d<sub>6</sub>, 400 MHz) δ: 8.81 (s, 1H, NH<sub>2</sub>), 8.56 (s, 1H, NH<sub>2</sub>), 8.04 (s, 1H, NH<sub>2</sub>), 7.77 (s, 1H, NH<sub>2</sub>) ppm; <sup>13</sup>C NMR (DMSO-d<sub>6</sub>, 100 MHz) δ: 162.41, 153.61, 150.44, 147.42, 109.47 ppm (See Figure S12). ESI-HRMS: m/z calculated for [M-H]<sup>+</sup>: 239.0283, found: 239.0282(1). IR (KBr, cm<sup>-1</sup>): 3483.42, 3431.90, 3333.44, 3205.61, 1684.94, 1633.17, 1605.24, 1565.96, 1523.60, 1491.91, 1453.41, 1396.89, 1340.13, 1291.72, 1242.11, 1220.57, 1091.12, 983.45, 881.85, 851.93, 807.86, 784.96, 775.28, 728.80, 714.26, 600.36, 550.32. Elemental analysis (%) calcd: C 25.01, H 1.68, N 46.66; found: C 24.67, H 1.82, N 46.40.

## The theoretical calculations on the solid-state heat of formation of Compound 1 and Compound 2

The enthalpy ( $H$ ) for compound at standard condition (298K, 1atm) were directly calculated by G4(MP2)-6x or G4(MP2)-XK method with Gaussian09 (Revision D.01) suite of program. G4(MP2)-6x method (*J. Chem. Theory Comput.*, 2011, 7, 112-120) is a composite procedure with a lower cost but performance approaching that of G4. In this method, geometries were optimized with the BMK functional using the 6-31+G(2df, p) basis set. Zero-point vibrational energies (ZPVEs) and thermal corrections to enthalpy ( $\Delta H$ ) at 298K, derived from scaled BMK/6-31+G(2df, p) frequencies, were incorporated into the total energies. Single-point energies were obtained at the HF/GFHF3, HF/GFHF4, MP2(FrZG4)/GTMP2LargeXP, and CCSD(T, FrZG4)/GTBas1 levels with composite procedures. However, since Pople basis set is not applicable to iodine element, for Iodine-containing compound G4(MP2)-XK method is adopted. G4(MP2)-XK method (*J. Chem. Theory Comput.*, 2019, 15, 4478–4484) is variant of the G4(MP2)-6X method with expanded applicability for main-group elements up to Radon.

After acquiring the enthalpy of compound or ions, their gas phase enthalpy of formation can be calculated by atomization method as following equation (1):

$$\Delta H_f(g) = H(C_1H_mO_nN_iCl_j(g)) - 1H(C(g)) - 0.5(m-j)H(H_2(g)) - 0.5nH(O_2(g)) - 0.5iH(N_2(g)) - 0.5jH(HCl(g)) + 1H_{vap}(\text{graphite}) \quad (1)$$

For neutral compounds with calculated gas state heat of formation, the solid state heat of formation was calculated by the following equation (2). The heat of sublimation  $\Delta H_{SUB}$  was estimated by the following equation (3). T is the melting point or decomposition point temperature in Kelvin.

$$\Delta H_f(s) = \Delta H_f(g) - \Delta H_{SUB} \quad (2)$$

$$\Delta H_{SUB}(g) = 0.188 \cdot T \quad (3)$$

For ionic compound, solid state heat of formation was calculated by equation (4). In the equation, enthalpy of lattice  $\Delta H_L$  was estimated by equation (5) and (6). In equation 5 and 6, p, q are charge number for cation and anion;  $n_M$ ,  $n_X$ ,  $\gamma$  and  $\delta$  are constant decided by structure of ion;  $\rho_m$  and  $M_m$  are density and molecular weight.

More details about the parameters for equation 7 and 8 can be found in *Inorg. Chem.* 2002, 41, 2364–2367.

$$\Delta H_f(\text{ion},s) = m\Delta H_f(\text{cation},g) + n\Delta H_f(\text{anion},g) - \Delta H_L \quad (4)$$

$$\Delta H_L = U_{\text{pot}} + [p(0.5n_M-2) + q(0.5n_X-2)]RT \quad (5)$$

$$U_{\text{pot}} = \gamma(\rho m/Mm)^{1/3} + \delta \quad (6)$$
